# Supplementary material for: Corrigendum to “Human MLL‐AF9 Overexpression Induces Aberrant Hematopoietic Expansion in Zebrafish”
Source: Hindawi journal article supplement (doi:10.1155/2022/9839650), 2022-01-01
Supplement: f1 [file 9839650.f1.zip]

兴华集团

Fermentas 湖北地区代理商

订购电话: 13807170917

15V

0.5-1.0

1.3 A

2.5 A

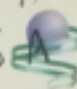

Fermentas

SM0671

彩色预染中分子量蛋白  
marker

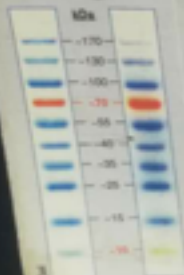

SM1811

双彩色预染高分子量蛋白  
marker

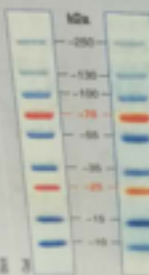

SM1841

多彩色预染高分子量蛋白  
marker

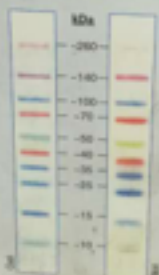

SM1851

超高分子量彩色预染蛋白  
marker

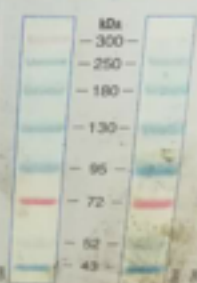

SM1861

超高分子量彩色预染蛋白  
marker

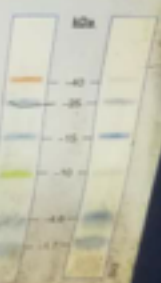

| 货号     | 规格    | 电泳泳道数 | 货号  | 规格     | 电泳泳道数 | 货号   | 规格  | 电泳泳道数  | 货号    | 规格   | 电泳泳道数 | 货号     | 规格    | 电泳泳道数 | 货号  | 规格     | 电泳泳道数 |      |
|--------|-------|-------|-----|--------|-------|------|-----|--------|-------|------|-------|--------|-------|-------|-----|--------|-------|------|
| SM0671 | 250ul | 10/5  | 400 | SM1811 | 250ul | 10/5 | 600 | SM1841 | 250ul | 10/5 | 150   | SM1851 | 250ul | 10/5  | 150 | SM1861 | 250ul | 10/5 |
| SM0671 | 250ul | 10/5  | 400 | SM1811 | 250ul | 10/5 | 600 | SM1841 | 250ul | 10/5 | 150   | SM1851 | 250ul | 10/5  | 150 | SM1861 | 250ul | 10/5 |
