# Supplementary material for: Corrigendum to “Human MLL-AF9 Overexpression Induces Aberrant Hematopoietic Expansion in Zebrafish”
Source: Biomed Res Int. 2022 Jan 22;2022:9839650. doi: 10.1155/2022/9839650 (PMC8800627; doi:10.1155/2022/9839650)
Supplement: Supplementary Materials — Original Western blot for MLL in Figure 1(a) in the article and an independent replicate of the same experiment. Original Western blot for GADPH from Figure 1(a). Images of the MLL1 (D2M7U) Rabbit mAb (Amino-terminal Antigen) antibody. Raw mRNA expression levels for Figures 1(b), 2(i)–2(k), 3(e), and 4(e). [file 9839650.f1.zip]

Archive with 15 entries (15 files):
- Annotated replicate Western Blot for MLL.jpg
- Annotated Western Blot for MLL from Figure 1(a).jpg
- MLL1 (D2M7U) Rabbit mAb (Amino-terminal Antigen) antibody in the laboratory 2.pdf
- MLL1 (D2M7U) Rabbit mAb (Amino-terminal Antigen) antibody in the laboratory.pdf
- mRNA expression for Fig 1b.xlsx
- mRNA expression for Fig 2i.xlsx
- mRNA expression for Fig 2j.xlsx
- mRNA expression for Fig 2k.xlsx
- mRNA expression for Fig 3e.xlsx
- mRNA expression for Fig 4e.xlsx
- Original Western Blot for GAPDH from Figure 1(a).pdf
- Original Western Blot for MLL from Figure 1(a).tif
- Replicate Western Blot for MLL.tif
- Thermo Fisher PageRulerTM  26616, current specification.pdf
- Thermo Fisher PageRulerTM  26616, former specification in the laboratory.pdf
