# Supplementary material for: Corrigendum to “Human MLL-AF9 Overexpression Induces Aberrant Hematopoietic Expansion in Zebrafish”
Source: Biomed Res Int. 2022 Jan 22;2022:9839650. doi: 10.1155/2022/9839650 (PMC8800627; doi:10.1155/2022/9839650)
Supplement: Supplementary Materials — Original Western blot for MLL in Figure 1(a) in the article and an independent replicate of the same experiment. Original Western blot for GADPH from Figure 1(a). Images of the MLL1 (D2M7U) Rabbit mAb (Amino-terminal Antigen) antibody. Raw mRNA expression levels for Figures 1(b), 2(i)–2(k), 3(e), and 4(e). [file 9839650.f1.zip › mRNA expression for Fig 1b.xlsx]

## Sheet: 0
Target	Sample	Cq	Cq Mean	Cq Std. Dev
actin	wt	17.217	17.2443	0.0910492
actin	wt	17.17	17.2443	0.0910492
actin	wt	17.3458	17.2443	0.0910492
actin	mll	16.7496	16.8959	0.126782
actin	mll	16.9741	16.8959	0.126782
actin	mll	16.9639	16.8959	0.126782
hoxb5a	wt	26.8646	26.8281	0.0715806
hoxb5a	wt	26.8739	26.8281	0.0715806
hoxb5a	wt	26.7456	26.8281	0.0715806
hoxb5a	mll	25.0451	25.1021	0.0879553
hoxb5a	mll	25.2034	25.1021	0.0879553
hoxb5a	mll	25.0578	25.1021	0.0879553
hoxa2b	wt	27.8574	27.9643	0.0928271
hoxa2b	wt	28.0105	27.9643	0.0928271
hoxa2b	wt	28.025	27.9643	0.0928271
hoxa2b	mll	27.0147	27.0152	0.0194517
hoxa2b	mll	27.0349	27.0152	0.0194517
hoxa2b	mll	26.996	27.0152	0.0194517
hoxb5b	wt	29.5652	29.6166	0.0482763
hoxb5b	wt	29.6236	29.6166	0.0482763
hoxb5b	wt	29.661	29.6166	0.0482763
hoxb5b	mll	29.0005	29.0014	0.0362536
hoxb5b	mll	28.9656	29.0014	0.0362536
hoxb5b	mll	29.0381	29.0014	0.0362536
hoxa9a	wt	25.859	25.6896	0.16978
hoxa9a	wt	25.6904	25.6896	0.16978
hoxa9a	wt	25.5194	25.6896	0.16978
hoxa9a	mll	24.9544	24.8875	0.087872
hoxa9a	mll	24.9202	24.8875	0.087872
hoxa9a	mll	24.788	24.8875	0.087872
meis1	wt	22.8899	23.0052	0.104766
meis1	wt	23.0947	23.0052	0.104766
meis1	wt	23.0309	23.0052	0.104766
meis1	mll	21.7552	21.8053	0.0461495
meis1	mll	21.8461	21.8053	0.0461495
meis1	mll	21.8145	21.8053	0.0461495

## Sheet: Run Information
File Name	20160829mll200ng.pcrd
Created By User	admin
Notes
ID
Run Started	2016/8/29 16:32:41 UTC +08:00
Run Ended	2016/8/29 18:27:23 UTC +08:00
Sample Vol	25
Lid Temp	105
Protocol File Name	new protocol.prcl
Plate Setup File Name	20160829-af9-200ng-2dpf.pltd
Base Serial Number	CC014297
Optical Head Serial Number	785BR5638
CFX Manager Version	1.6.541.1028.
