# Supplementary material for: Corrigendum to “Human MLL-AF9 Overexpression Induces Aberrant Hematopoietic Expansion in Zebrafish”
Source: Biomed Res Int. 2022 Jan 22;2022:9839650. doi: 10.1155/2022/9839650 (PMC8800627; doi:10.1155/2022/9839650)
Supplement: Supplementary Materials — Original Western blot for MLL in Figure 1(a) in the article and an independent replicate of the same experiment. Original Western blot for GADPH from Figure 1(a). Images of the MLL1 (D2M7U) Rabbit mAb (Amino-terminal Antigen) antibody. Raw mRNA expression levels for Figures 1(b), 2(i)–2(k), 3(e), and 4(e). [file 9839650.f1.zip › mRNA expression for Fig 2i.xlsx]

## Sheet: Sheet1
Target	Sample	Cq	Cq Mean	Cq Std. Dev
actin	wt	17.217	17.2443	0.0910492
actin	wt	17.17	17.2443	0.0910492
actin	wt	17.3458	17.2443	0.0910492
actin	mll	16.7496	16.8959	0.126782
actin	mll	16.9741	16.8959	0.126782
actin	mll	16.9639	16.8959	0.126782
pu1	wt	31.2921	31.2419	0.0677366
pu1	wt	31.2688	31.2419	0.0677366
pu1	wt	31.1648	31.2419	0.0677366
pu1	mll	30.2353	30.2114	0.0229635
pu1	mll	30.1895	30.2114	0.0229635
pu1	mll	30.2094	30.2114	0.0229635
lmo2	wt	25.729	25.8259	0.0901949
lmo2	wt	25.8414	25.8259	0.0901949
lmo2	wt	25.9073	25.8259	0.0901949
lmo2	mll	24.8729	24.876	0.0426332
lmo2	mll	24.9201	24.876	0.0426332
lmo2	mll	24.835	24.876	0.0426332
actin	wt	17.9289	17.8281	0.089334
actin	wt	17.7587	17.8281	0.089334
actin	wt	17.7968	17.8281	0.089334
actin	mll	16.6164	16.6491	0.0287044
actin	mll	16.6607	16.6491	0.0287044
actin	mll	16.6702	16.6491	0.0287044
scl	wt	28.4397	28.3264	0.168736
scl	wt	28.1324	28.3264	0.168736
scl	wt	28.407	28.3264	0.168736
scl	mll	26.5003	26.6193	0.121033
scl	mll	26.7422	26.6193	0.121033
scl	mll	26.6152	26.6193	0.121033
actin	wt	19.2562	19.2722	0.0156905
actin	wt	19.2876	19.2722	0.0156905
actin	wt	19.2728	19.2722	0.0156905
actin	mll	19.2262	19.1908	0.0316673
actin	mll	19.1652	19.1908	0.0316673
actin	mll	19.1811	19.1908	0.0316673
gata1	wt	26.3005	26.248	0.0791585
gata1	wt	26.2865	26.248	0.0791585
gata1	wt	26.1569	26.248	0.0791585
gata1	mll	25.9602	25.9602
gata1	mll	25.9015	25.9015
gata1	mll	25.9154	25.9154
