# Supplementary material for: Corrigendum to “Human MLL-AF9 Overexpression Induces Aberrant Hematopoietic Expansion in Zebrafish”
Source: Biomed Res Int. 2022 Jan 22;2022:9839650. doi: 10.1155/2022/9839650 (PMC8800627; doi:10.1155/2022/9839650)
Supplement: Supplementary Materials — Original Western blot for MLL in Figure 1(a) in the article and an independent replicate of the same experiment. Original Western blot for GADPH from Figure 1(a). Images of the MLL1 (D2M7U) Rabbit mAb (Amino-terminal Antigen) antibody. Raw mRNA expression levels for Figures 1(b), 2(i)–2(k), 3(e), and 4(e). [file 9839650.f1.zip › mRNA expression for Fig 2j.xlsx]

## Sheet: Sheet1
Target	Sample	Cq	Cq Mean	Cq Std. Dev
atin	WT2d	21.1631	21.2664	0.0992028
atin	WT2d	21.2753	21.2664	0.0992028
atin	WT2d	21.3609	21.2664	0.0992028
atin	MLL2d	21.4549	21.5031	0.0419268
atin	MLL2d	21.5229	21.5031	0.0419268
atin	MLL2d	21.5314	21.5031	0.0419268
csf1r	WT2d	30.7387	30.5664	0.24892
csf1r	WT2d	30.281	30.5664	0.24892
csf1r	WT2d	30.6795	30.5664	0.24892
csf1r	MLL2d	29.7251	29.6196	0.099626
csf1r	MLL2d	29.6066	29.6196	0.099626
csf1r	MLL2d	29.5272	29.6196	0.099626
l-plastin	mll2d	22.8508	22.9602	0.155447
l-plastin	mll2d	22.8917	22.9602	0.155447
l-plastin	mll2d	23.1382	22.9602	0.155447
l-plastin	wt2d	23.7511	23.5499	0.181801
l-plastin	wt2d	23.5012	23.5499	0.181801
l-plastin	wt2d	23.3975	23.5499	0.181801
actin	mll2d	14.3752	14.3528	0.0664752
actin	mll2d	14.278	14.3528	0.0664752
actin	mll2d	14.4051	14.3528	0.0664752
actin	wt2d	14.3547	14.3013	0.0707495
actin	wt2d	14.3281	14.3013	0.0707495
actin	wt2d	14.2211	14.3013	0.0707495
Actin	wt2d	19.1803	19.1935	0.0661827
Actin	wt2d	19.1349	19.1935	0.0661827
Actin	wt2d	19.2653	19.1935	0.0661827
Actin	mll2d	18.7525	18.7616	0.0663904
Actin	mll2d	18.7003	18.7616	0.0663904
Actin	mll2d	18.8321	18.7616	0.0663904
mfap4	wt2d	24.3473	24.3682	0.0237361
mfap4	wt2d	24.3632	24.3682	0.0237361
mfap4	wt2d	24.394	24.3682	0.0237361
mfap4	mll2d	23.7904	23.5774	0.184447
mfap4	mll2d	23.467	23.5774	0.184447
mfap4	mll2d	23.4749	23.5774	0.184447
actin	wt48h	20.9721	20.9895	0.116222
actin	wt48h	21.1135	20.9895	0.116222
actin	wt48h	20.883	20.9895	0.116222
actin	mll48h	19.8824	20.0131	0.151088
actin	mll48h	19.9784	20.0131	0.151088
actin	mll48h	20.1786	20.0131	0.151088
mpo	wt48h	26.1701	26.296	0.11755
mpo	wt48h	26.3152	26.296	0.11755
mpo	wt48h	26.4028	26.296	0.11755
mpo	mll48h	24.3536	24.292	0.0750965
mpo	mll48h	24.2084	24.292	0.0750965
mpo	mll48h	24.3141	24.292	0.0750965
actin	wt-con-2d	17.2453	17.3176	0.109949
actin	wt-con-2d	17.2633	17.3176	0.109949
actin	wt-con-2d	17.4441	17.3176	0.109949
actin	mll-con-2d	17.8245	18.0074	0.15888
actin	mll-con-2d	18.111	18.0074	0.15888
actin	mll-con-2d	18.0867	18.0074	0.15888
lyz	wt-con-2d	20.2026	20.3609	0.144168
lyz	wt-con-2d	20.4847	20.3609	0.144168
lyz	wt-con-2d	20.3955	20.3609	0.144168
lyz	mll-con-2d	20.5024	20.608	0.132868
lyz	mll-con-2d	20.5645	20.608	0.132868
lyz	mll-con-2d	20.7572	20.608	0.132868
actin	wt2d	22.0365	21.9645	0.0634431
actin	wt2d	21.9404	21.9645	0.0634431
actin	wt2d	21.9167	21.9645	0.0634431
actin	mll2d	21.8256	21.9082	0.105396
actin	mll2d	22.0269	21.9082	0.105396
actin	mll2d	21.8721	21.9082	0.105396
csf3r	wt2d	33.346	32.7722	0.607986
csf3r	wt2d	32.135	32.7722	0.607986
csf3r	wt2d	32.8356	32.7722	0.607986
csf3r	mll2d	32.1192	31.894	0.212592
csf3r	mll2d	31.866	31.894	0.212592
csf3r	mll2d	31.6968	31.894	0.212592
Actin	wt-2d	15.4256	15.3766	0.0693467
Actin	wt-2d	15.3276	15.3766	0.0693467
Actin	mll-2d	15.1185	15.1251	0.0465261
Actin	mll-2d	15.0822	15.1251	0.0465261
Actin	mll-2d	15.1745	15.1251	0.0465261
hbbe1	wt-2d	17.431	17.6242	0.174278
hbbe1	wt-2d	17.672	17.6242	0.174278
hbbe1	wt-2d	17.7696	17.6242	0.174278
hbbe1	mll-2d	16.4796	16.5952	0.148847
hbbe1	mll-2d	16.7632	16.5952	0.148847
hbbe1	mll-2d	16.5428	16.5952	0.148847
