# Supplementary material for: Corrigendum to “Human MLL-AF9 Overexpression Induces Aberrant Hematopoietic Expansion in Zebrafish”
Source: Biomed Res Int. 2022 Jan 22;2022:9839650. doi: 10.1155/2022/9839650 (PMC8800627; doi:10.1155/2022/9839650)
Supplement: Supplementary Materials — Original Western blot for MLL in Figure 1(a) in the article and an independent replicate of the same experiment. Original Western blot for GADPH from Figure 1(a). Images of the MLL1 (D2M7U) Rabbit mAb (Amino-terminal Antigen) antibody. Raw mRNA expression levels for Figures 1(b), 2(i)–2(k), 3(e), and 4(e). [file 9839650.f1.zip › mRNA expression for Fig 2k.xlsx]

## Sheet: Sheet1
Target	Sample	Cq	Cq Mean	Cq Std. Dev
actin	wt	19.2562	19.2722	0.0156905
actin	wt	19.2876	19.2722	0.0156905
actin	wt	19.2728	19.2722	0.0156905
actin	mll	19.2262	19.1908	0.0316673
actin	mll	19.1652	19.1908	0.0316673
actin	mll	19.1811	19.1908	0.0316673
flk1	wt	28.6514	28.5365	0.108946
flk1	wt	28.5235	28.5365	0.108946
flk1	wt	28.4347	28.5365	0.108946
flk1	mll	27.8743	27.941	0.140156
flk1	mll	28.1021	27.941	0.140156
flk1	mll	27.8467	27.941	0.140156
actin	wt	14.6893	14.887	0.243922
actin	wt	14.8122	14.887	0.243922
actin	wt	15.1596	14.887	0.243922
actin	mll	15.0978	15.0935	0.0341736
actin	mll	15.0573	15.0935	0.0341736
actin	mll	15.1253	15.0935	0.0341736
fli	wt	21.6467	21.7984	0.168884
fli	wt	21.9804	21.7984	0.168884
fli	wt	21.768	21.7984	0.168884
fli	mll	21.4569	21.5893	0.156572
fli	mll	21.7621	21.5893	0.156572
fli	mll	21.5489	21.5893	0.156572
actin	wt2d	22.0365	21.9645	0.0634431
actin	wt2d	21.9404	21.9645	0.0634431
actin	wt2d	21.9167	21.9645	0.0634431
actin	mll2d	21.8256	21.9082	0.105396
actin	mll2d	22.0269	21.9082	0.105396
actin	mll2d	21.8721	21.9082	0.105396
runx1	wt2d	28.2115	28.2386	0.0653331
runx1	wt2d	28.3131	28.2386	0.0653331
runx1	wt2d	28.1911	28.2386	0.0653331
runx1	mll2d	27.2121	27.1138	0.0941861
runx1	mll2d	27.1048	27.1138	0.0941861
runx1	mll2d	27.0244	27.1138	0.0941861
cmyb	wt2d	29.1938	28.9976	0.17649
cmyb	wt2d	28.8519	28.9976	0.17649
cmyb	wt2d	28.9469	28.9976	0.17649
cmyb	mll2d	28.4886	28.4314	0.0501836
cmyb	mll2d	28.3946	28.4314	0.0501836
cmyb	mll2d	28.4111	28.4314	0.0501836
