# Supplementary material for: Corrigendum to “Human MLL-AF9 Overexpression Induces Aberrant Hematopoietic Expansion in Zebrafish”
Source: Biomed Res Int. 2022 Jan 22;2022:9839650. doi: 10.1155/2022/9839650 (PMC8800627; doi:10.1155/2022/9839650)
Supplement: Supplementary Materials — Original Western blot for MLL in Figure 1(a) in the article and an independent replicate of the same experiment. Original Western blot for GADPH from Figure 1(a). Images of the MLL1 (D2M7U) Rabbit mAb (Amino-terminal Antigen) antibody. Raw mRNA expression levels for Figures 1(b), 2(i)–2(k), 3(e), and 4(e). [file 9839650.f1.zip › mRNA expression for Fig 3e.xlsx]

## Sheet: Sheet1
Target	Sample	Cq	Cq Mean	Cq Std. Dev
actin	wt-con-2d	17.2453	17.3176	0.109949
actin	wt-con-2d	17.2633	17.3176	0.109949
actin	wt-con-2d	17.4441	17.3176	0.109949
actin	wt-dox-2d	17.2382	17.5158	0.358594
actin	wt-dox-2d	17.3885	17.5158	0.358594
actin	wt-dox-2d	17.9207	17.5158	0.358594
actin	mll-con-2d	17.8245	18.0074	0.15888
actin	mll-con-2d	18.111	18.0074	0.15888
actin	mll-con-2d	18.0867	18.0074	0.15888
actin	mll-dox-2d	18.1262	18.0486	0.110449
actin	mll-dox-2d	17.9221	18.0486	0.110449
actin	mll-dox-2d	18.0974	18.0486	0.110449
csf1r	wt-con-2d	23.276	23.1104	0.174276
csf1r	wt-con-2d	22.9286	23.1104	0.174276
csf1r	wt-con-2d	23.1267	23.1104	0.174276
csf1r	wt-dox-2d	23.5169	23.3209	0.195308
csf1r	wt-dox-2d	23.3196	23.3209	0.195308
csf1r	wt-dox-2d	23.1263	23.3209	0.195308
csf1r	mll-con-2d	22.8078	22.8831	0.106538
csf1r	mll-con-2d	22.9585	22.8831	0.106538
csf1r	mll-dox-2d	23.0167	22.9781	0.0605514
csf1r	mll-dox-2d	22.9083	22.9781	0.0605514
csf1r	mll-dox-2d	23.0092	22.9781	0.0605514
mfap4	wt-con-2d	21.7108	21.5819	0.13348
mfap4	wt-con-2d	21.5908	21.5819	0.13348
mfap4	wt-con-2d	21.4442	21.5819	0.13348
mfap4	wt-dox-2d	21.6645	21.5999	0.0576588
mfap4	wt-dox-2d	21.5814	21.5999	0.0576588
mfap4	wt-dox-2d	21.5537	21.5999	0.0576588
mfap4	mll-con-2d	21.2451	21.3159	0.0813173
mfap4	mll-con-2d	21.2979	21.3159	0.0813173
mfap4	mll-con-2d	21.4047	21.3159	0.0813173
mfap4	mll-dox-2d	21.5456	21.5867	0.0633432
mfap4	mll-dox-2d	21.5549	21.5867	0.0633432
mfap4	mll-dox-2d	21.6596	21.5867	0.0633432
mpo	wt-con-2d	24.0281	23.8347	0.177009
mpo	wt-con-2d	23.7953	23.8347	0.177009
mpo	wt-con-2d	23.6808	23.8347	0.177009
mpo	wt-dox-2d	22.9699	23.3091	0.293764
mpo	wt-dox-2d	23.4828	23.3091	0.293764
mpo	wt-dox-2d	23.4745	23.3091	0.293764
mpo	mll-con-2d	23.4389	23.4477	0.00768539
mpo	mll-con-2d	23.4512	23.4477	0.00768539
mpo	mll-con-2d	23.453	23.4477	0.00768539
mpo	mll-dox-2d	24.123	24.1166	0.0247736
mpo	mll-dox-2d	24.1376	24.1166	0.0247736
mpo	mll-dox-2d	24.0893	24.1166	0.0247736
lyz	wt-con-2d	20.2026	20.3609	0.144168
lyz	wt-con-2d	20.4847	20.3609	0.144168
lyz	wt-con-2d	20.3955	20.3609	0.144168
lyz	wt-dox-2d	20.47	20.4061	0.0562964
lyz	wt-dox-2d	20.3638	20.4061	0.0562964
lyz	wt-dox-2d	20.3845	20.4061	0.0562964
lyz	mll-con-2d	20.5024	20.608	0.132868
lyz	mll-con-2d	20.5645	20.608	0.132868
lyz	mll-con-2d	20.7572	20.608	0.132868
lyz	mll-dox-2d	21.0364	21.0639	0.0571844
lyz	mll-dox-2d	21.0256	21.0639	0.0571844
lyz	mll-dox-2d	21.1296	21.0639	0.0571844
runx1	wt-con-2d	26.4872	26.4455	0.0589303
runx1	wt-con-2d	26.4039	26.4455	0.0589303
runx1	wt-dox-2d	26.2392	26.2512	0.0380137
runx1	wt-dox-2d	26.2206	26.2512	0.0380137
runx1	wt-dox-2d	26.2938	26.2512	0.0380137
runx1	mll-con-2d	23.5726	23.5375	0.0381108
runx1	mll-con-2d	23.497	23.5375	0.0381108
runx1	mll-con-2d	23.543	23.5375	0.0381108
runx1	mll-dox-2d	25.8482	25.9111	0.107988
runx1	mll-dox-2d	25.8492	25.9111	0.107988
runx1	mll-dox-2d	26.0358	25.9111	0.107988
actin	wt-con	17.0145	17.0437	0.210637
actin	wt-con	16.8492	17.0437	0.210637
actin	wt-con	17.2674	17.0437	0.210637
actin	wt-dox	17.1183	17.083	0.0498755
actin	wt-dox	17.0478	17.083	0.0498755
actin	mll-con	17.1551	17.1551	0
actin	mll-dox	16.6456	16.785	0.197097
actin	mll-dox	16.9244	16.785	0.197097
c-myb	wt-con	25.4387	25.5739	0.164238
c-myb	wt-con	25.5264	25.5739	0.164238
c-myb	wt-con	25.7567	25.5739	0.164238
c-myb	wt-dox	25.9439	25.8725	0.100964
c-myb	wt-dox	25.8011	25.8725	0.100964
c-myb	mll-con	24.9882	24.9498	0.0543831
c-myb	mll-con	24.9113	24.9498	0.0543831
c-myb	mll-dox	25.1294	25.1106	0.22976
c-myb	mll-dox	25.3305	25.1106	0.22976
c-myb	mll-dox	24.8721	25.1106	0.22976
actin	wt-dox	17.1668	17.1668	0
actin	mll-con	17.1424	17.151	0.0148885
actin	mll-con	17.1682	17.151	0.0148885
actin	mll-con	17.1424	17.151	0.0148885
actin	mll-dox	17.1534	17.2402	0.122746
actin	mll-dox	17.327	17.2402	0.122746
c-myb	wt-dox	25.8852	25.8852	0
c-myb	mll-con	24.744	24.7535	0.0134333
c-myb	mll-con	24.763	24.7535	0.0134333
c-myb	mll-dox	25.0659	24.938	0.111007
c-myb	mll-dox	24.8801	24.938	0.111007
c-myb	mll-dox	24.8678	24.938	0.111007
actin	wt-2dcon	16.5019	16.4785	0.0203117
actin	wt-2dcon	16.4654	16.4785	0.0203117
actin	wt-2dcon	16.4683	16.4785	0.0203117
actin	wt-2ddox	16.3439	16.3541	0.0233701
actin	wt-2ddox	16.3374	16.3541	0.0233701
actin	wt-2ddox	16.3808	16.3541	0.0233701
actin	mll-2dcon	16.1795	16.2597	0.081558
actin	mll-2dcon	16.2571	16.2597	0.081558
actin	mll-2dcon	16.3425	16.2597	0.081558
actin	mll-2ddox	16.4007	16.3938	0.0127096
actin	mll-2ddox	16.3791	16.3938	0.0127096
actin	mll-2ddox	16.4015	16.3938	0.0127096
l-plastin	wt-2dcon	25.647	25.6145	0.0780938
l-plastin	wt-2dcon	25.5254	25.6145	0.0780938
l-plastin	wt-2dcon	25.6711	25.6145	0.0780938
l-plastin	wt-2ddox	25.9064	25.8979	0.0183778
l-plastin	wt-2ddox	25.8768	25.8979	0.0183778
l-plastin	wt-2ddox	25.9104	25.8979	0.0183778
l-plastin	mll-2dcon	24.8887	24.8349	0.0465783
l-plastin	mll-2dcon	24.8084	24.8349	0.0465783
l-plastin	mll-2dcon	24.8077	24.8349	0.0465783
l-plastin	mll-2ddox	25.1069	25.1684	0.110033
l-plastin	mll-2ddox	25.1028	25.1684	0.110033
l-plastin	mll-2ddox	25.2954	25.1684	0.110033
