# Supplementary material for: Corrigendum to “Human MLL-AF9 Overexpression Induces Aberrant Hematopoietic Expansion in Zebrafish”
Source: Biomed Res Int. 2022 Jan 22;2022:9839650. doi: 10.1155/2022/9839650 (PMC8800627; doi:10.1155/2022/9839650)
Supplement: Supplementary Materials — Original Western blot for MLL in Figure 1(a) in the article and an independent replicate of the same experiment. Original Western blot for GADPH from Figure 1(a). Images of the MLL1 (D2M7U) Rabbit mAb (Amino-terminal Antigen) antibody. Raw mRNA expression levels for Figures 1(b), 2(i)–2(k), 3(e), and 4(e). [file 9839650.f1.zip › mRNA expression for Fig 4e.xlsx]

## Sheet: Sheet1
Target	Sample	Cq	Cq Mean	Cq Std. Dev
actin	wt-con	18.0774	18.1215	0.0877765
actin	wt-con	18.0644	18.1215	0.0877765
actin	wt-con	18.2225	18.1215	0.0877765
actin	wt-mi2	16.6771	16.9243	0.217403
actin	wt-mi2	17.01	16.9243	0.217403
actin	wt-mi2	17.0858	16.9243	0.217403
mfap4	wt-con	22.2194	22.3148	0.105462
mfap4	wt-con	22.4281	22.3148	0.105462
mfap4	wt-con	22.297	22.3148	0.105462
mfap4	wt-mi2	21.1339	21.3168	0.161104
mfap4	wt-mi2	21.3791	21.3168	0.161104
mfap4	wt-mi2	21.4375	21.3168	0.161104
runx1	wt-con	26.0663	26.0579	0.0467072
runx1	wt-con	26.0998	26.0579	0.0467072
runx1	wt-con	26.0076	26.0579	0.0467072
runx1	wt-mi2	25.0958	25.1447	0.0692697
runx1	wt-mi2	25.1937	25.1447	0.0692697
actin	wt	16.6653	16.7185	0.0598905
actin	wt	16.7068	16.7185	0.0598905
actin	wt	16.7833	16.7185	0.0598905
runx1	wt	25.5048	25.646	0.125417
runx1	wt	25.7446	25.646	0.125417
runx1	wt	25.6885	25.646	0.125417
actin	mll-mi2	17.4275	17.3873	0.0529024
actin	mll-mi2	17.3273	17.3873	0.0529024
actin	mll-mi2	17.407	17.3873	0.0529024
runx1	mll-mi2	25.5377	25.6523	0.105384
runx1	mll-mi2	25.7451	25.6523	0.105384
runx1	mll-mi2	25.6741	25.6523	0.105384
actin	mll	18.2709	18.2911	0.0510354
actin	mll	18.2532	18.2911	0.0510354
actin	mll	18.3491	18.2911	0.0510354
runx1	mll	25.5472	25.4426	0.147984
runx1	mll	25.3379	25.4426	0.147984
actin	mll-con	15.9274	15.9674	0.0365086
actin	mll-con	15.999	15.9674	0.0365086
actin	mll-con	15.9758	15.9674	0.0365086
actin	mll-mi2	16.1249	16.0656	0.0839936
actin	mll-mi2	16.0062	16.0656	0.0839936
mfap4	mll-con	21.6993	21.7887	0.091431
mfap4	mll-con	21.7847	21.7887	0.091431
mfap4	mll-con	21.882	21.7887	0.091431
mfap4	mll-mi2	22.1756	22.2008	0.0227007
mfap4	mll-mi2	22.2071	22.2008	0.0227007
mfap4	mll-mi2	22.2197	22.2008	0.0227007
actin	wt-con	16.0387	15.9825	0.079448
actin	wt-con	15.9263	15.9825	0.079448
mfap4	wt-con	22.3508	22.3355	0.0133174
mfap4	wt-con	22.3278	22.3355	0.0133174
mfap4	wt-con	22.3278	22.3355	0.0133174
Actin	mll-mi2	15.6963	15.8008	0.101968
Actin	mll-mi2	15.8062	15.8008	0.101968
Actin	mll-mi2	15.9	15.8008	0.101968
c-myb	mll-mi2	24.872	24.7968	0.0665711
c-myb	mll-mi2	24.7454	24.7968	0.0665711
c-myb	mll-mi2	24.7731	24.7968	0.0665711
Actin	wt-mi2	15.2377	15.2631	0.0305474
Actin	wt-mi2	15.2546	15.2631	0.0305474
Actin	wt-mi2	15.297	15.2631	0.0305474
c-myb	wt-mi2	24.6927	24.6515	0.104921
c-myb	wt-mi2	24.7295	24.6515	0.104921
c-myb	wt-mi2	24.5322	24.6515	0.104921
Actin	mll-con	15.2708	15.2296	0.0474891
Actin	mll-con	15.1777	15.2296	0.0474891
Actin	mll-con	15.2404	15.2296	0.0474891
c-myb	mll-con	23.7244	23.7844	0.0519655
c-myb	mll-con	23.8156	23.7844	0.0519655
c-myb	mll-con	23.8132	23.7844	0.0519655
Actin	wt-con	15.9457	15.8954	0.0552768
Actin	wt-con	15.9043	15.8954	0.0552768
Actin	wt-con	15.8362	15.8954	0.0552768
c-myb	wt-con	25.2685	25.1968	0.0940377
c-myb	wt-con	25.2315	25.1968	0.0940377
c-myb	wt-con	25.0903	25.1968	0.0940377
actin	wt-con	16.2639	16.1711	0.0821458
actin	wt-con	16.1075	16.1711	0.0821458
actin	wt-con	16.1421	16.1711	0.0821458
actin	wt-mi2	16.0541	16.0632	0.023195
actin	wt-mi2	16.0459	16.0632	0.023195
actin	wt-mi2	16.0895	16.0632	0.023195
actin	mll-con	16.0894	16.1179	0.051386
actin	mll-con	16.087	16.1179	0.051386
actin	mll-con	16.1772	16.1179	0.051386
actin	mll-mi2	16.3418	16.3539	0.0575953
actin	mll-mi2	16.4165	16.3539	0.0575953
actin	mll-mi2	16.3033	16.3539	0.0575953
lyz	wt-con	23.0438	23.1057	0.0584485
lyz	wt-con	23.16	23.1057	0.0584485
lyz	wt-con	23.1133	23.1057	0.0584485
lyz	wt-mi2	23.145	23.0741	0.0750269
lyz	wt-mi2	22.9955	23.0741	0.0750269
lyz	wt-mi2	23.0817	23.0741	0.0750269
lyz	mll-con	22.5169	22.6019	0.1005
lyz	mll-con	22.7128	22.6019	0.1005
lyz	mll-con	22.5759	22.6019	0.1005
lyz	mll-mi2	23.598	23.5403	0.0556889
lyz	mll-mi2	23.4869	23.5403	0.0556889
lyz	mll-mi2	23.5361	23.5403	0.0556889
actin	wt-3dcon	16.4701	16.3716	0.111405
actin	wt-3dcon	16.2507	16.3716	0.111405
actin	wt-3dcon	16.3939	16.3716	0.111405
actin	wt-3dmi2	16.3701	16.3362	0.040687
actin	wt-3dmi2	16.3474	16.3362	0.040687
actin	wt-3dmi2	16.2911	16.3362	0.040687
actin	mll-3dcon	16.3063	16.285	0.0521087
actin	mll-3dcon	16.2256	16.285	0.0521087
actin	mll-3dcon	16.3231	16.285	0.0521087
actin	mll-3dmi2	16.3341	16.3973	0.0591325
actin	mll-3dmi2	16.4066	16.3973	0.0591325
actin	mll-3dmi2	16.4513	16.3973	0.0591325
l-plastin	wt-3dcon	25.664	25.6746	0.0727039
l-plastin	wt-3dcon	25.6077	25.6746	0.0727039
l-plastin	wt-3dcon	25.752	25.6746	0.0727039
l-plastin	wt-3dmi2	25.5894	25.4664	0.111245
l-plastin	wt-3dmi2	25.3728	25.4664	0.111245
l-plastin	wt-3dmi2	25.437	25.4664	0.111245
l-plastin	mll-3dcon	25.1741	25.1775	0.126804
l-plastin	mll-3dcon	25.0525	25.1775	0.126804
l-plastin	mll-3dcon	25.306	25.1775	0.126804
l-plastin	mll-3dmi2	25.4276	25.4098	0.103385
l-plastin	mll-3dmi2	25.5032	25.4098	0.103385
l-plastin	mll-3dmi2	25.2987	25.4098	0.103385
Actin	wt-con	17.6914	17.6914	0
Actin	wt-con	17.6733	17.6733	0
Actin	wt-con	17.9144	17.9144	0
Actin	wt-mi2	17.8568	17.8568	0
Actin	wt-mi2	17.699	17.699	0
Actin	wt-mi2	17.5041	17.5041	0
Actin	mll-con	17.6668	17.6668	0
Actin	mll-con	17.715	17.715	0
Actin	mll-con	17.7865	17.7865	0
Actin	mll-mi2	17.7445	17.7445	0
Actin	mll-mi2	17.6908	17.6908	0
Actin	mll-mi2	17.7487	17.7487	0
csfir	wt-con	26.6562	26.6562	0
csfir	wt-con	26.4809	26.4809	0
csfir	wt-con	26.4085	26.4085	0
csfir	wt-mi2	27.1379	27.1379	0
csfir	wt-mi2	27.1891	27.1891	0
csfir	wt-mi2	27.1862	27.1862	0
csfir	mll-con	25.7122	25.7122	0
csfir	mll-con	25.835	25.835	0
csfir	mll-con	25.6053	25.6053	0
csfir	mll-mi2	26.9111	26.9111	0
csfir	mll-mi2	26.7309	26.7309	0
csfir	mll-mi2	26.6505	26.6505	0
actin	wt-con	16.8115	16.658	0.158868
actin	wt-con	16.6683	16.658	0.158868
actin	wt-con	16.4943	16.658	0.158868
actin	wt-mi2	16.4627	16.4223	0.0572189
actin	wt-mi2	16.3818	16.4223	0.0572189
actin	mll-con	16.4704	16.4564	0.206405
actin	mll-con	16.6555	16.4564	0.206405
actin	mll-con	16.2434	16.4564	0.206405
actin	mll-mi2	16.47	16.4667	0.165281
actin	mll-mi2	16.6303	16.4667	0.165281
actin	mll-mi2	16.2998	16.4667	0.165281
mpo	wt-con	25.485	25.3499	0.188885
mpo	wt-con	25.4307	25.3499	0.188885
mpo	wt-con	25.1341	25.3499	0.188885
mpo	wt-mi2	24.4678	24.2351	0.21857
mpo	wt-mi2	24.2036	24.2351	0.21857
mpo	wt-mi2	24.034	24.2351	0.21857
mpo	mll-con	23.6318	23.6333	0.095839
mpo	mll-con	23.7299	23.6333	0.095839
mpo	mll-con	23.5382	23.6333	0.095839
mpo	mll-mi2	24.6118	24.3494	0.228821
mpo	mll-mi2	24.191	24.3494	0.228821
mpo	mll-mi2	24.2456	24.3494	0.228821
