# Supplementary figures and images for: Corrigendum to “Human MLL‐AF9 Overexpression Induces Aberrant Hematopoietic Expansion in Zebrafish”
Source: Hindawi journal article supplement (doi:10.1155/2022/9839650), 2022-01-01

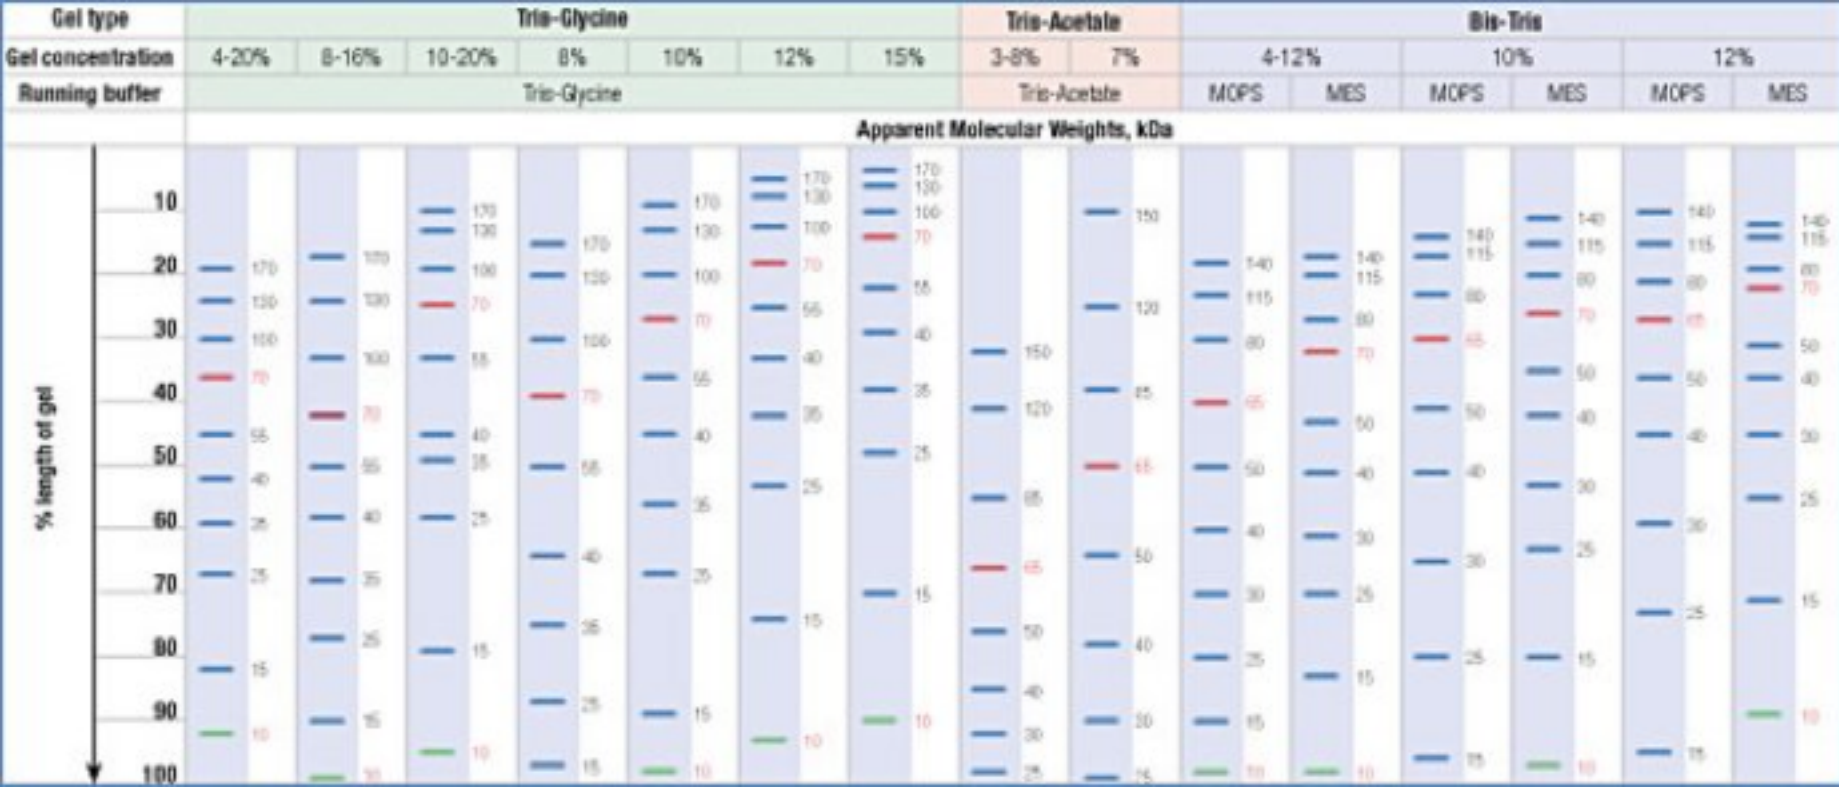

Supplement: f1 [file 9839650.f1.zip]

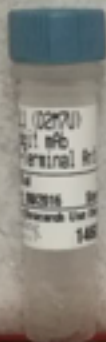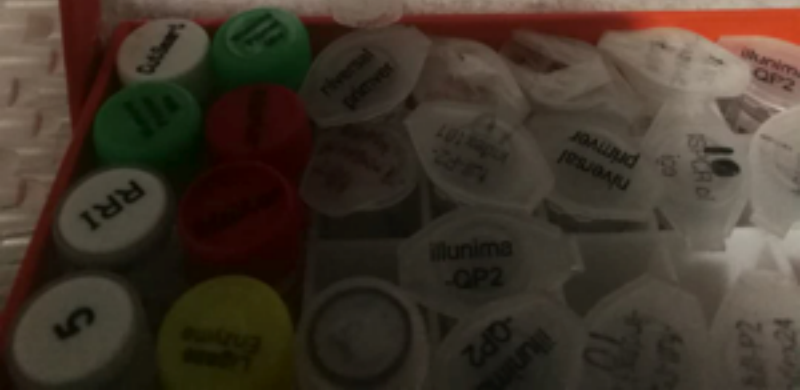

Supplement: f1 [file 9839650.f1.zip]

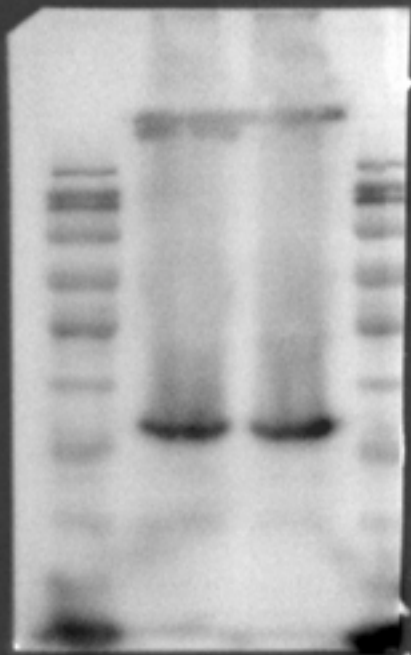

Supplement: f1 [file 9839650.f1.zip]

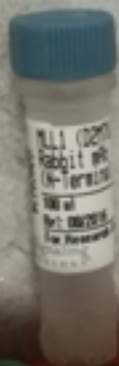

Outlier

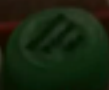

Reverse  
Primer

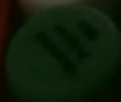

RRI

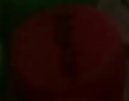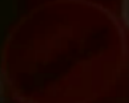

Reverse  
Primer

Reverse  
Primer

Supplement: f1 [file 9839650.f1.zip]
